# Supplementary material for: Artificial intelligence-guided tissue analysis combined with immune infiltrate assessment predicts stage III colon cancer outcomes in PETACC08 study
Source: PubMed Central journal article supplement — Gut. 2019 Nov 28;69(4):681–90. doi: 10.1136/gutjnl-2019-319292 (PMC7063404; doi:10.1136/gutjnl-2019-319292), 2019-11-28

**Figure S1: Flowchart of PETACC8 cohort analysis**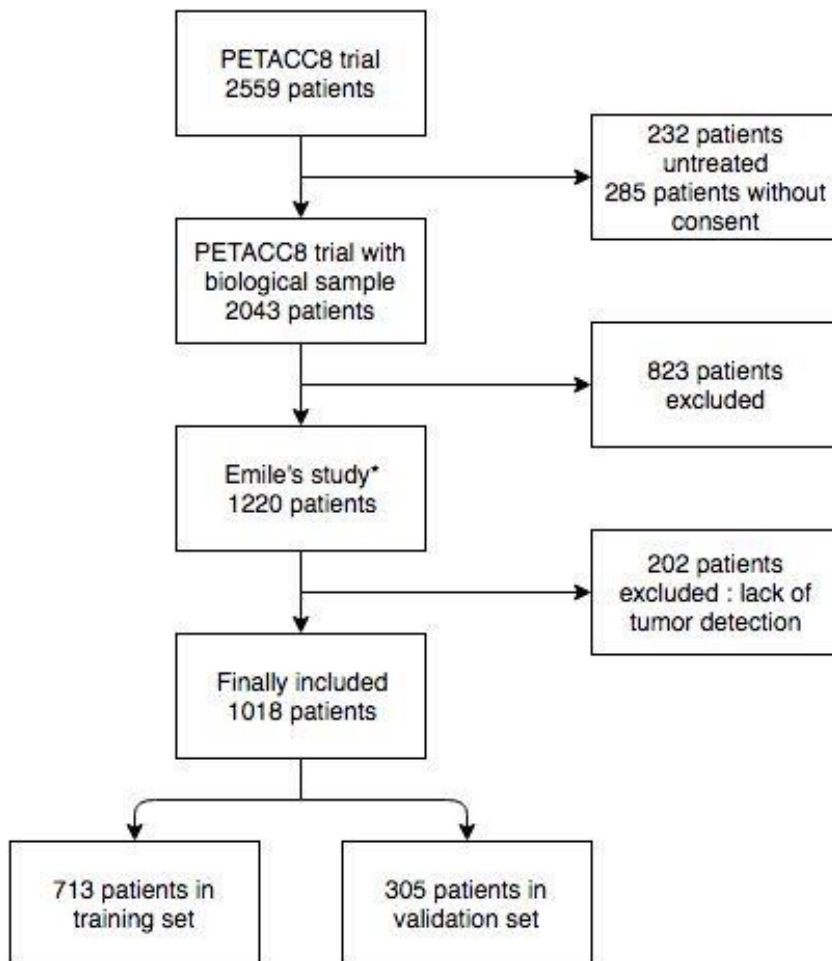

\*Emile J-F, Eur J Cancer, 2017.

## Figure S2: Kaplan-Meier of interest

### A

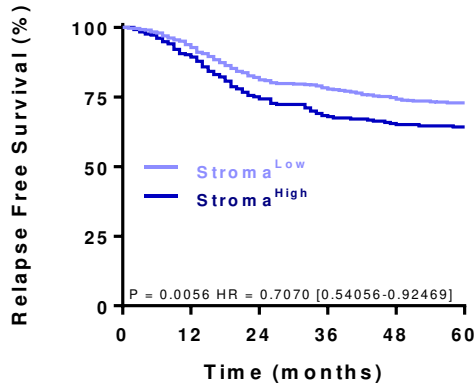

|         |     |     |     |     |     |     |
|---------|-----|-----|-----|-----|-----|-----|
| Number  | 763 | 714 | 622 | 590 | 533 | 505 |
| at risk | 255 | 228 | 189 | 170 | 158 | 152 |

### B

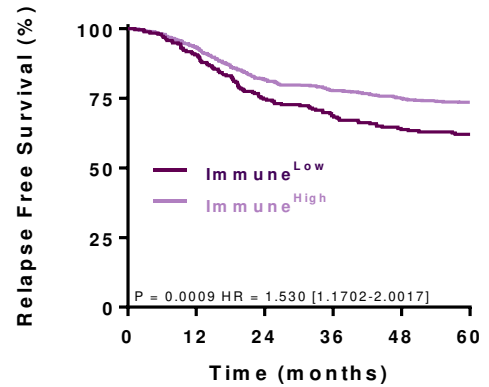

|         |     |     |     |     |     |     |
|---------|-----|-----|-----|-----|-----|-----|
| Number  | 255 | 231 | 188 | 170 | 153 | 142 |
| at risk | 763 | 709 | 620 | 587 | 550 | 513 |

### C

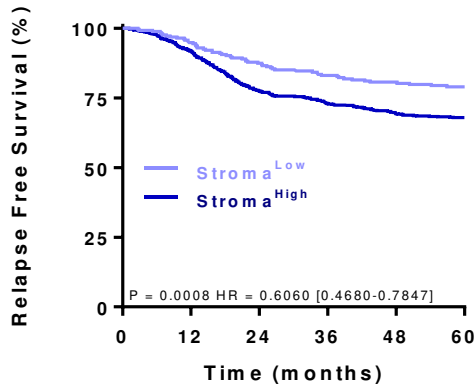

|         |     |     |     |     |     |     |
|---------|-----|-----|-----|-----|-----|-----|
| Number  | 255 | 242 | 223 | 210 | 196 | 181 |
| at risk | 763 | 698 | 586 | 547 | 507 | 474 |

### D

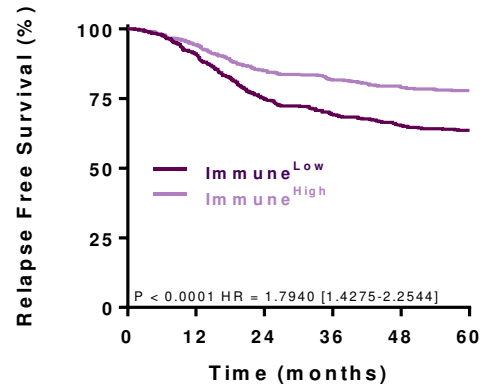

|         |     |     |     |     |     |     |
|---------|-----|-----|-----|-----|-----|-----|
| Number  | 509 | 461 | 377 | 345 | 315 | 293 |
| at risk | 509 | 479 | 432 | 412 | 387 | 362 |

### E

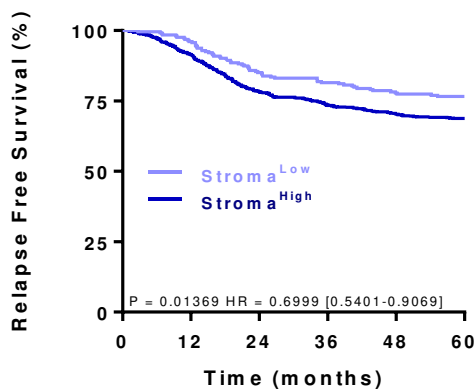

|         |     |     |     |     |     |     |
|---------|-----|-----|-----|-----|-----|-----|
| Number  | 255 | 245 | 217 | 204 | 188 | 177 |
| at risk | 763 | 695 | 592 | 553 | 515 | 478 |

### F

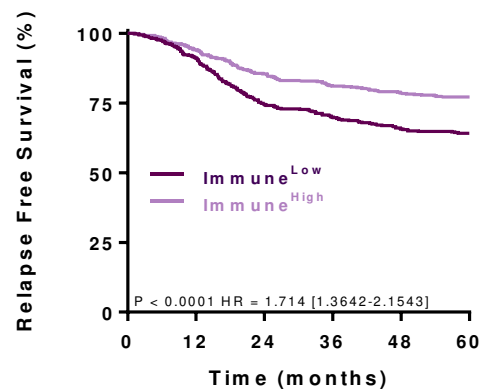

|         |     |     |     |     |     |     |
|---------|-----|-----|-----|-----|-----|-----|
| Number  | 509 | 462 | 375 | 349 | 319 | 293 |
| at risk | 509 | 478 | 434 | 408 | 383 | 362 |

## Figure S3: Correlation between immune parameters and areas of interest

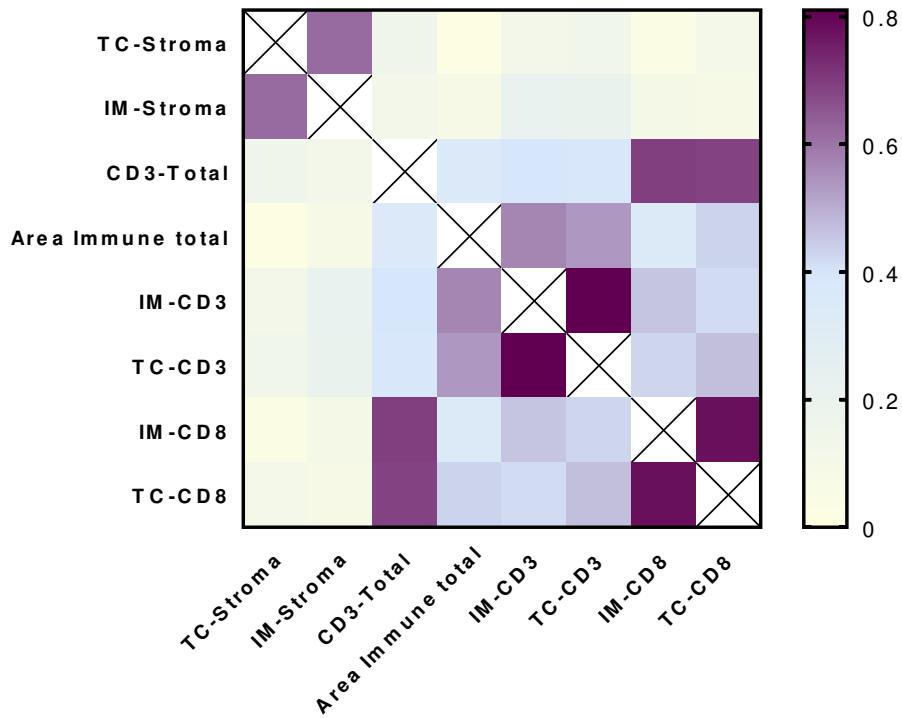

## Figure S4: Pronostic value of immune T cells analysis

### A

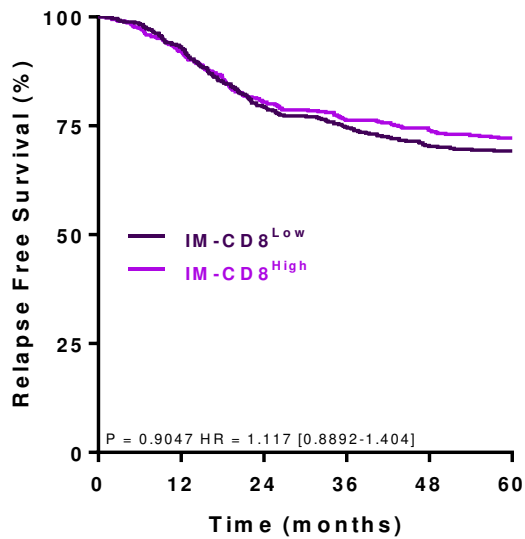

|         |     |     |     |     |     |     |
|---------|-----|-----|-----|-----|-----|-----|
| Number  | 509 | 474 | 402 | 375 | 344 | 319 |
| at risk | 509 | 467 | 408 | 383 | 360 | 336 |

### B

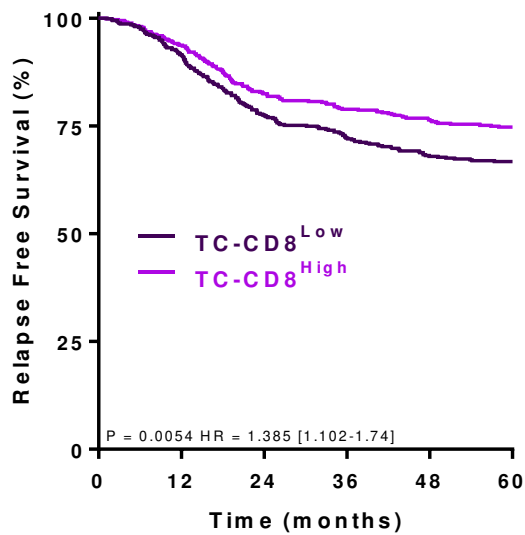

|         |     |     |     |     |     |     |
|---------|-----|-----|-----|-----|-----|-----|
| Number  | 509 | 466 | 393 | 363 | 336 | 314 |
| at risk | 509 | 475 | 417 | 395 | 368 | 341 |

## Figure S5: Correlation between TC-CD3<sup>+</sup>, DGMate and relative stroma area

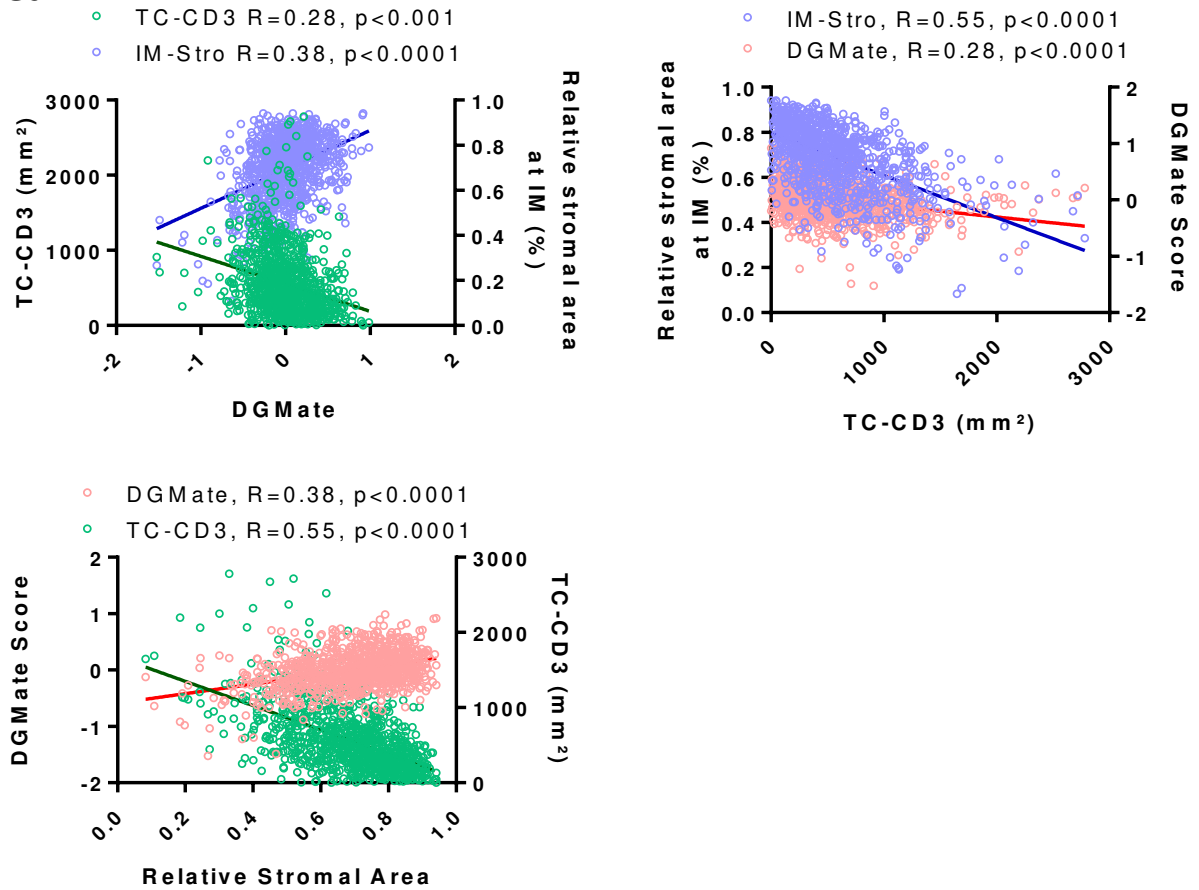

## Figure S6: Survival comparison of composite variables depending on adjuvant chemotherapy

A

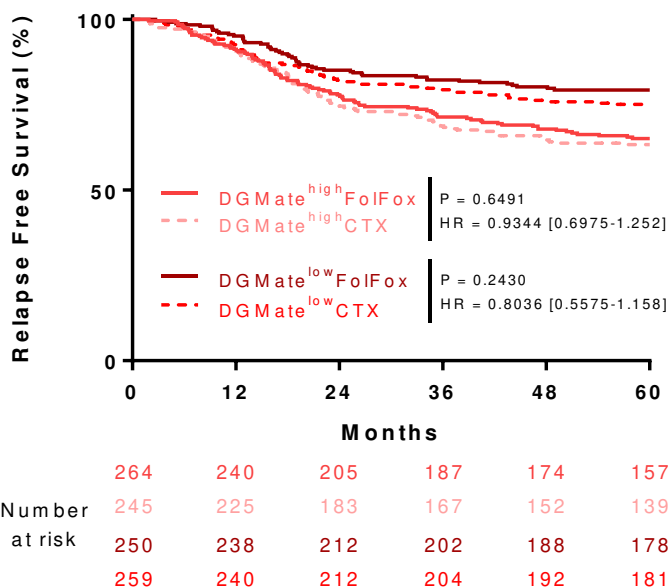

B

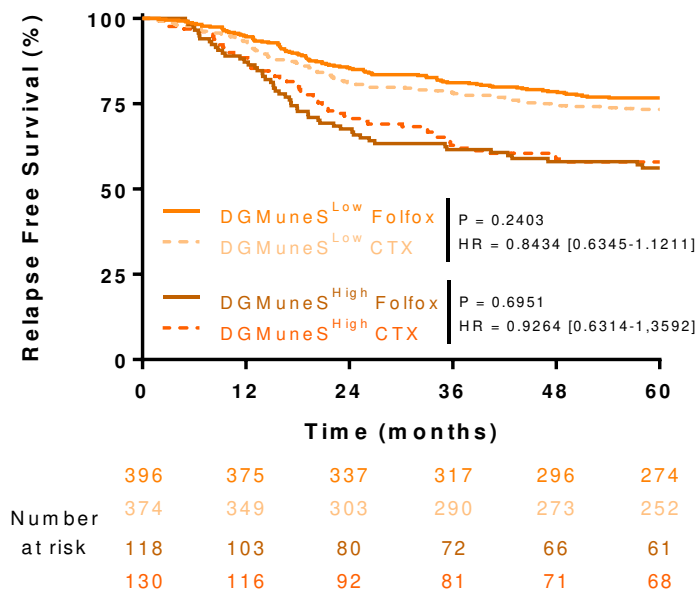

Supplement: gutjnl-2019-319292supp003.pdf [file gutjnl-2019-319292supp003.pdf]
