# Supplementary material for: Artificial intelligence-guided tissue analysis combined with immune infiltrate assessment predicts stage III colon cancer outcomes in PETACC08 study
Source: PubMed Central journal article supplement — Gut. 2019 Nov 28;69(4):681–90. doi: 10.1136/gutjnl-2019-319292 (PMC7063404; doi:10.1136/gutjnl-2019-319292), 2019-11-28
Supplement: gutjnl-2019-319292supp002.pdf [file gutjnl-2019-319292supp002.pdf]

**Supplementary Table 1| Predictive value of ColoClass model in each differentiation subtype.**

|         | UNDIFFERENTIATED | POORLY       | MODERATELY   | WELL         | Total         |
|---------|------------------|--------------|--------------|--------------|---------------|
| Stroma  | 77.5 (249)       | 84.61 (2287) | 83.38 (5290) | 81.96 (1917) | 83.21 (9743)  |
| Healthy | 93.30 (179)      | 83.97 (624)  | 68.68 (2002) | 89.45 (616)  | 76.67 (3421)  |
| Immune  | 99.31 (145)      | 94.86 (1225) | 93.38 (3140) | 96.2 (894)   | 94.21 (5404)  |
| Tumor   | 83.6 (165)       | 80.99 (1820) | 86.96 (4563) | 80.1 (1543)  | 84.43 (8091)  |
| Total   | 86.99 (738)      | 85.54 (5956) | 84.6 (14995) | 84.87 (4970) | 84.97 (26659) |

**Supplementary Table 2| Clinical characteristics of the PETACC08 cohort patients included in the analysis.**

|                               | <b>N=1018° (%)</b> |
|-------------------------------|--------------------|
| <b>Gender</b>                 |                    |
| Female                        | 426 (41.8)         |
| Male                          | 592 (58.2)         |
| <b>Treatment</b>              |                    |
| Folfox                        | 514 (50.5)         |
| Folfox + Cetuximab            | 504 (49.5)         |
| <b>Age - Mean (sd)</b>        | 59.5 (9.35)        |
| <b>Histopathology grading</b> |                    |
| Moderately                    | 610 (59.9)         |
| Well                          | 184 (18.1)         |
| Poorly                        | 131 (12.9)         |
| Undifferentiated              | 81 (7.9)           |
| Unknown                       | 12 (1.2)           |
| <b>T</b>                      |                    |
| T1                            | 26 (2.5)           |
| T2                            | 65 (6.4)           |
| T3                            | 725 (71.3)         |
| T4                            | 202 (19.8)         |
| <b>N</b>                      |                    |
| N1                            | 659 (64.7)         |
| N2                            | 359 (35.3)         |
| <b>Tumor side</b>             |                    |
| Left side                     | 588 (57.8)         |
| Right side                    | 430 (42.2)         |
| <b>KRAS</b>                   |                    |
| Mutated                       | 469 (46.0)         |
| Wild-type                     | 549 (54.0)         |
| <b>BRAF</b>                   |                    |
| Mutated                       | 117 (11.5)         |
| Wild-type                     | 872 (85.6)         |
| Unknown                       | 29 (2.9)           |
| <b>MSS status</b>             |                    |
| MSI                           | 96 (9.4)           |
| MSS                           | 903 (88.7)         |
| Unknown                       | 19 (1.9)           |

**Supplementary Table 3 | Description of IM Relative Stromal Area in function of clinical parameters.**

|                         | T status |      |      |      | N status |      | Sideness |       | MMR status |      | Mutationnal RAS/RAF status |      |      |
|-------------------------|----------|------|------|------|----------|------|----------|-------|------------|------|----------------------------|------|------|
|                         | T1       | T2   | T3   | T4   | N1       | N2   | Left     | Right | pMMR       | dMMR | WT                         | KRAS | BRAF |
| <b>Number</b>           | 26       | 65   | 725  | 202  | 659      | 359  | 588      | 430   | 903        | 96   | 401                        | 503  | 114  |
| <b>Mean</b>             | 0.60     | 0.61 | 0.69 | 0.72 | 0.69     | 0.70 | 0.69     | 0.69  | 0.69       | 0.69 | 0.69                       | 0.70 | 0.67 |
| <b>SD</b>               | 0.13     | 0.17 | 0.13 | 0.14 | 0.14     | 0.14 | 0.14     | 0.14  | 0.14       | 0.16 | 0.15                       | 0.14 | 0.15 |
| <b>Median</b>           | 0.61     | 0.62 | 0.72 | 0.76 | 0.71     | 0.73 | 0.72     | 0.71  | 0.72       | 0.72 | 0.72                       | 0.72 | 0.69 |
| <b>Min</b>              | 0.27     | 0.08 | 0.19 | 0.11 | 0.11     | 0.08 | 0.11     | 0.08  | 0.11       | 0.08 | 0.19                       | 0.11 | 0.08 |
| <b>Max</b>              | 0.81     | 0.92 | 0.94 | 0.94 | 0.94     | 0.94 | 0.94     | 0.94  | 0.94       | 0.93 | 0.94                       | 0.94 | 0.88 |
| <b>Lower CI 95%</b>     | 0.54     | 0.57 | 0.68 | 0.70 | 0.68     | 0.69 | 0.68     | 0.68  | 0.68       | 0.65 | 0.67                       | 0.68 | 0.64 |
| <b>Upper CI 95% Max</b> | 0.65     | 0.65 | 0.70 | 0.74 | 0.70     | 0.72 | 0.71     | 0.70  | 0.70       | 0.72 | 0.70                       | 0.71 | 0.70 |

In red statistical difference using Anova test

**Supplementary Table 4| List of variables retained in the lasso model.**

| <b>Variable</b>                                 | <b>Hazard-Ratio</b> | <b>95%-IC</b> | <b>p-value</b> |
|-------------------------------------------------|---------------------|---------------|----------------|
| OD Sum Haralick Contrast                        | 1.247               | 0.984-1.572   | 0.07           |
| Hematoxylin Haralick Angular second moment      | 0.713               | 0.517-0.985   | 0.04           |
| Hematoxylin Haralick Inverse difference moment  | 1.283               | 0.750-2.193   | 0.36           |
| DAB Haralick Angular second moment              | 1.081               | 0.840-1.391   | 0.54           |
| Residual Haralick Sum variance                  | 0.987               | 0.834-1.168   | 0.88           |
| Red Haralick Sum entropy                        | 1.225               | 0.674-2.225   | 0.51           |
| Red Haralick Information measure of correlation | 1.015               | 0.820-1.257   | 0.89           |
| Saturation Haralick Sum of squares              | 0.977               | 0.802-1.191   | 0.82           |
| Global p-value of model :                       | 0.002               |               |                |

Supplementary Table. 5 | Description of DGMate in function of clinical parameters.

## Discovery:

|              | T status |       |       |       | N status |       | Sideness |       | MMR status |       | Mutationnal RAS/RAF status |        |        |
|--------------|----------|-------|-------|-------|----------|-------|----------|-------|------------|-------|----------------------------|--------|--------|
|              | T1       | T2    | T3    | T4    | N1       | N2    | Left     | Right | pMM R      | dMM R | WT                         | KRAS   | BRAF   |
| Number       | 20       | 43    | 505   | 145   | 455      | 258   | 419      | 294   | 636        | 68    | 283                        | 352    | 78     |
| Mean         | 0,240    | 0,108 | 0,001 | 0,068 | 0,027    | 0,048 | 0,030    | 0,043 | 0,008      | 0,074 | 0,301                      | 0,298  | 0,361  |
| SD           | 0,441    | 0,311 | 0,288 | 0,340 | 0,306    | 0,312 | 0,311    | 0,305 | 0,310      | 0,311 | 0,301                      | 0,300  | 0,360  |
| Median       | 0,204    | 0,125 | 0,019 | 0,064 | 0,034    | 0,040 | 0,039    | 0,058 | 0,020      | 0,098 | -0,042                     | 0,005  | 0,124  |
| Min          | 1,524    | 0,670 | 1,491 | 1,222 | 1,524    | 1,222 | 1,524    | 1,222 | 1,524      | 0,617 | -1,491                     | -0,921 | -1,524 |
| Max          | 0,621    | 0,665 | 0,734 | 0,910 | 0,910    | 0,784 | 0,910    | 0,827 | 0,910      | 0,827 | 0,827                      | 0,910  | 0,684  |
| Lower CI 95% | 0,446    | 0,204 | 0,026 | 0,012 | 0,056    | 0,010 | 0,060    | 0,008 | 0,032      | 0,001 | -0,081                     | -0,018 | 0,029  |
| Upper CI 95% | -        | -     | -     | -     | -        | -     | -        | -     | -          | -     | -                          | -      | -      |
| Max          | 0,033    | 0,012 | 0,024 | 0,124 | 0,001    | 0,087 | 0,000    | 0,077 | 0,017      | 0,149 | -0,011                     | 0,044  | 0,191  |

## Validation:

|              | T status |       |       |       | N status |       | Sideness |       | MMR status |       | Mutationnal RAS/RAF status |        |        |
|--------------|----------|-------|-------|-------|----------|-------|----------|-------|------------|-------|----------------------------|--------|--------|
|              | T1       | T2    | T3    | T4    | N1       | N2    | Left     | Right | pMM R      | dMM R | WT                         | KRAS   | BRAF   |
| Number       | 6        | 22    | 220   | 57    | 204      | 101   | 169      | 136   | 267        | 28    | 118                        | 151    | 36     |
| Mean         | 0,240    | 0,228 | 0,001 | 0,044 | 0,067    | 0,095 | 0,064    | 0,050 | 0,012      | 0,042 | -0,032                     | -0,024 | 0,092  |
| SD           | 0,145    | 0,255 | 0,316 | 0,339 | 0,296    | 0,342 | 0,314    | 0,318 | 0,325      | 0,308 | 0,323                      | 0,309  | 0,352  |
| Median       | 0,226    | 0,224 | 0,009 | 0,025 | 0,079    | 0,095 | 0,063    | 0,021 | 0,018      | 0,055 | -0,050                     | -0,038 | 0,056  |
| Min          | 0,432    | 1,034 | 0,980 | 0,885 | 0,980    | 1,034 | 1,034    | 0,885 | 1,034      | 0,885 | -0,980                     | -1,034 | -0,885 |
| Max          | 0,013    | 0,146 | 0,983 | 0,918 | 0,721    | 0,983 | 0,793    | 0,983 | 0,983      | 0,557 | 0,918                      | 0,793  | 0,983  |
| Lower CI 95% | 0,392    | 0,341 | 0,043 | 0,046 | 0,108    | 0,027 | 0,112    | 0,004 | 0,051      | 0,162 | -0,091                     | -0,073 | -0,027 |
| Upper CI 95% | -        | -     | -     | -     | -        | -     | -        | -     | -          | -     | -                          | -      | -      |
| Max          | 0,087    | 0,115 | 0,041 | 0,134 | 0,026    | 0,162 | 0,017    | 0,104 | 0,027      | 0,077 | 0,027                      | 0,026  | 0,211  |

In red statistical difference using Anova test

**Supplementary Table. 6| Description of immune infiltrates in function of clinical parameters.**

**Immune cell at IM**

|     |                  | T status    |             |             |            | N status    |             | Sideness    |             | MMR status  |             | Mutationonal RAS/RAF status |             |             |
|-----|------------------|-------------|-------------|-------------|------------|-------------|-------------|-------------|-------------|-------------|-------------|-----------------------------|-------------|-------------|
|     |                  | T1          | T2          | T3          | T4         | N1          | N2          | Left        | Right       | pMMR        | dMMR        | WT                          | KRAS        | BRAF        |
|     | Number           | 26          | 65          | 725         | 202        | 659         | 359         | 588         | 430         | 903         | 96          | 401                         | 503         | 114         |
| CD3 | Mean             | <b>1618</b> | <b>1408</b> | <b>1046</b> | <b>986</b> | <b>1097</b> | <b>1026</b> | <b>1035</b> | <b>1122</b> | <b>1058</b> | <b>1149</b> | <b>1105</b>                 | <b>1030</b> | <b>1137</b> |
|     | SD               | 740         | 722         | 645         | 679        | 681         | 652         | 676         | 662         | 667         | 698         | 653                         | 664         | 755         |
|     | Median           | 1540        | 1307        | 921         | 830        | 980         | 866         | 881         | 1022        | 926         | 1067        | 1010                        | 901         | 868         |
|     | Min              | 660         | 194         | 0           | 31         | 39          | 0           | 39          | 0           | 0           | 117         | 31                          | 0           | 39          |
|     | Max              | 3209        | 3529        | 4454        | 4761       | 4761        | 3465        | 4761        | 3657        | 926         | 1067        | 4454                        | 4761        | 3718        |
|     | Lower CI 95%     | 1319        | 1229        | 999         | 892        | 1045        | 958         | 980         | 1059        | 1014        | 1008        | 1041                        | 972         | 997         |
|     | Upper CI 95% Max | 1916        | 1587        | 1093        | 1081       | 1149        | 1093        | 1090        | 1185        | 1101        | 1290        | 1169                        | 1088        | 1277        |
| CD8 | Mean             | <b>326</b>  | <b>295</b>  | <b>218</b>  | <b>242</b> | <b>229</b>  | <b>232</b>  | <b>588</b>  | <b>430</b>  | <b>225</b>  | <b>281</b>  | <b>236</b>                  | <b>220</b>  | <b>254</b>  |
|     | SD               | 281         | 285         | 247         | 266        | 249         | 266         | 215         | 250         | 253         | 281         | 272                         | 241         | 251         |
|     | Median           | 198         | 222         | 143         | 150        | 150         | 148         | 245         | 266         | 144         | 208         | 152                         | 142         | 164         |
|     | Min              | 2           | 5           | 1           | 2          | 1           | 1           | 1           | 1           | 1           | 2           | 1                           | 1           | 8           |
|     | Max              | 908         | 1271        | 2166        | 1567       | 2158        | 2166        | 2158        | 2166        | 2166        | 1380        | 2166                        | 1806        | 1380        |
|     | Lower CI 95%     | 213         | 224         | 200         | 205        | 210         | 204         | 195         | 225         | 209         | 224         | 209                         | 199         | 208         |
|     | Upper CI 95% Max | 440         | 365         | 236         | 279        | 248         | 259         | 235         | 276         | 242         | 338         | 262                         | 241         | 301         |

**Immune cell at TC**

|     |                  | T status   |            |            |            | N status   |            | Sideness   |            | MMR status |            | Mutationonal RAS/RAF status |            |            |
|-----|------------------|------------|------------|------------|------------|------------|------------|------------|------------|------------|------------|-----------------------------|------------|------------|
|     |                  | T1         | T2         | T3         | T4         | N1         | N2         | Left       | Right      | pMMR       | dMMR       | WT                          | KRAS       | BRAF       |
|     | Number           | 26         | 65         | 725        | 202        | 659        | 359        | 588        | 430        | 903        | 96         | 401                         | 503        | 114        |
| CD3 | Mean             | <b>814</b> | <b>708</b> | <b>544</b> | <b>513</b> | <b>574</b> | <b>520</b> | <b>530</b> | <b>589</b> | <b>532</b> | <b>751</b> | <b>568</b>                  | <b>525</b> | <b>642</b> |
|     | SD               | 377        | 424        | 402        | 444        | 406        | 431        | 400        | 434        | 393        | 562        | 408                         | 392        | 520        |
|     | Median           | 777        | 676        | 459        | 366        | 481        | 410        | 438        | 504        | 446        | 588        | 492                         | 429        | 490        |
|     | Min              | 199        | 74         | 0          | 2          | 7          | 0          | 7          | 0          | 0          | 17         | 2                           | 0          | 7          |
|     | Max              | 1889       | 2067       | 2781       | 2523       | 2675       | 2781       | 2781       | 2675       | 2781       | 2523       | 2523                        | 2675       | 2781       |
|     | Lower CI 95%     | 662        | 603        | 515        | 452        | 543        | 476        | 498        | 548        | 507        | 637        | 528                         | 491        | 546        |
|     | Upper CI 95% Max | 966        | 813        | 573        | 575        | 605        | 565        | 563        | 630        | 558        | 865        | 608                         | 560        | 739        |
| CD8 | Mean             | 149        | 139        | 119        | 129        | 122        | 126        | 110        | 141        | 116        | 192        | 116                         | 118        | 173        |
|     | SD               | <b>175</b> | <b>198</b> | <b>168</b> | <b>184</b> | <b>162</b> | <b>192</b> | <b>160</b> | <b>189</b> | <b>163</b> | <b>248</b> | <b>172</b>                  | <b>156</b> | <b>235</b> |
|     | Median           | 90         | 84         | 59         | 63         | 64         | 59         | 58         | 72         | 60         | 102        | 56                          | 66         | 90         |
|     | Min              | 0          | 3          | 1          | 1          | 0          | 2          | 0          | 1          | 0          | 1          | 0                           | 1          | 5          |
|     | Max              | 740        | 1222       | 1773       | 1369       | 1473       | 1773       | 1773       | 1473       | 1773       | 1369       | 1773                        | 1473       | 1185       |
|     | Lower CI 95%     | 78         | 90         | 107        | 103        | 109        | 106        | 97         | 123        | 105        | 142        | 99                          | 104        | 129        |
|     | Upper CI 95% Max | 220        | 188        | 131        | 154        | 134        | 146        | 123        | 158        | 126        | 242        | 133                         | 131        | 216        |

In red statistical difference using Anova test



**Supplementary Table 7 | Univariate analysis variable prognostic role in relapse free survival.**

| PETTAC8 patients (n=1018)     |                          |              |             |          |                           |              |             |          |
|-------------------------------|--------------------------|--------------|-------------|----------|---------------------------|--------------|-------------|----------|
| Univariate cox models         |                          |              |             |          |                           |              |             |          |
|                               | Discovery cohort (N=713) |              |             |          | Validation cohort (N=305) |              |             |          |
|                               | N° (%)                   | Hazard ratio | IC 95%      | p-value  | N° (%)                    | Hazard ratio | IC 95%      | p-value  |
| <b>Gender</b>                 |                          |              |             |          |                           |              |             |          |
| Female                        | 284 (39.8)               | 1            |             |          | 142 (46.6)                | 1            |             |          |
| Male                          | 429 (60.2)               | 0.954        | 0.724-1.257 | 0.74     | 163 (53.4)                | 1.207        | 0.784-1.86  | 0.39     |
| <b>Treatment</b>              |                          |              |             |          |                           |              |             |          |
| Folfox                        | 355 (49.8)               | 1            |             |          | 159 (52.1)                | 1            |             |          |
| Folfox + Cetux                | 358 (50.2)               | 1.048        | 0.800-1.373 | 0.73     | 146 (47.9)                | 1.313        | 0.855-2.017 | 0.21     |
| <b>Age - Mean (sd)</b>        | 59.5 (9.35)              | 1.009        | 0.879-1.158 | 0.9      | 60.2 (9.03)               | 0.919        | 0.746-1.132 | 0.43     |
| <b>Histopathology grading</b> |                          |              |             |          |                           |              |             |          |
| Moderately                    | 435 (61.0)               | 1            |             |          | 175 (57.4)                | 1            |             |          |
| Well                          | 134 (18.8)               | 0.83         | 0.565-1.218 | 0.34     | 50 (16.4)                 | 1.004        | 0.595-1.694 | 0.99     |
| Poorly                        | 130 (18.2)               | 1.435        | 1.031-1.998 | 0.03     | 1 (0.3)                   | 1.207        | 0.675-2.158 | 0.53     |
| Undifferentiated              | 5 (0.7)                  | 0.694        | 0.097-4.967 | 0.72     | 76 (24.9)                 | ?            | ?           | ?        |
| Unknown                       | 9 (1.3)                  | -            | -           | -        | 3 (1.0)                   | -            | -           | -        |
| <b>T</b>                      |                          |              |             |          |                           |              |             |          |
| T1                            | 20 (2.8)                 | 0.43         | 0.18-1.05   | 0.06     | 6 (2.0)                   | 0.94         | 0.24-3.69   | 0.93     |
| T2                            | 43 (6.0)                 | 0.42         | 0.22-0.80   | 0.009    | 22 (7.2)                  | 0.81         | 0.58-2.62   | 0.58     |
| T3                            | 505 (70.8)               | 1            |             |          | 220 (72.1)                | 1            |             |          |
| T4                            | 145 (20.3)               | 2.29         | 1.58-3.32   | 0.0001   | 57 (18.7)                 | 2.99         | 1.83-4.91   | 0.0001   |
| <b>N</b>                      |                          |              |             |          |                           |              |             |          |
| N1                            | 455 (63.8)               | 1            |             |          | 204 (66.9)                | 1            |             |          |
| N2                            | 258 (36.2)               | 2.464        | 1.879-3.231 | 6.87E-11 | 101 (33.1)                | 2.302        | 1.500-3.533 | 1.00E-04 |
| <b>Tumor side</b>             |                          |              |             |          |                           |              |             |          |
| Left side                     | 419 (58.8)               | 1            |             |          | 169 (55.4)                | 1            |             |          |
| Right side                    | 294 (41.2)               | 0.994        | 0.755-1.308 | 0.97     | 136 (44.6)                | 0.791        | 0.511-1.226 | 0.29     |
| <b>KRAS</b>                   |                          |              |             |          | 166 (54.4)                |              |             |          |
| Wild-type                     | 383 (53.7)               | 1            |             |          |                           | 1            |             |          |
| Mutated                       | 330 (46.3)               | 1.602        | 1.221-2.105 | 0.0007   | 139 (45.6)                | 1.094        | 0.713-1.68  | 0.68     |



|                       |                    |       |                 |              |                    |       |                 |       |
|-----------------------|--------------------|-------|-----------------|--------------|--------------------|-------|-----------------|-------|
| <b>BRAF</b>           |                    |       |                 |              |                    |       |                 |       |
| Wild-type             | 614 (86.1)         | 1     |                 |              | 258 (84.6)         | 1     |                 |       |
| Mutated               | 80 (11.2)          | 1.017 | 0.659-<br>1.57  | 0.94         | 37 (12.1)          | 1.08  | 0.556-<br>2.096 | 0.82  |
| Unknown               | 19 (2.7)           | -     | -               | -            | 10 (3.3)           | -     | -               | -     |
| <b>MSS status</b>     |                    |       |                 |              |                    |       |                 |       |
| MSS                   | 636 (89.2)         | 1     |                 |              | 267 (87.5)         | 1     |                 |       |
| MSI                   | 68 (9.5)           | 0.714 | 0.442-<br>1.207 | 0.21         | 28 (9.2)           | 1.122 | 0.54-<br>2.356  | 0.76  |
| Unknown               | 9 (1.3)            | -     | -               | -            | 10 (3.3)           | -     | -               | -     |
| <b>CD3 TC</b>         | 552.66<br>(424.36) | 0.794 | 0.679-<br>0.929 | 4.00E-<br>03 | 560.87<br>(394.95) | 0.653 | 0.494-<br>0.863 | 0.003 |
| <b>Stroma Area IM</b> | 0.69 (0.14)        | 1.271 | 1.098-<br>1.472 | 1.00E-<br>03 | 0.69 (0.14)        | 1.292 | 1.018-<br>1.639 | 0.04  |
| <b>Digital score</b>  | 0 (0.31)           | 2.718 | 1.718-<br>4.3   | 1.93E-<br>05 | -0.01 (0.32)       | 2.598 | 1.314-<br>5.137 | 0.006 |

**Supplementary Table 8| Univariate analysis of the prognostic role of Dgmate and Dgmunes in relapse free survival in Stage 3 subgroup.**

|              | Dgmate       |                    |              | Dgmunes      |                    |              |
|--------------|--------------|--------------------|--------------|--------------|--------------------|--------------|
|              | Hazard ratio | IC95%              | p-value      | Hazard ratio | IC95%              | p-value      |
| <b>T3N1</b>  |              |                    |              |              |                    |              |
| <b>N=474</b> | <b>2.36</b>  | <b>(1.11-5.01)</b> | <b>0.026</b> | <b>2.69</b>  | <b>(1.42-5.11)</b> | <b>0.024</b> |
| <b>T3N2</b>  |              |                    |              |              |                    |              |
| <b>N=251</b> | <b>2.01</b>  | <b>(1.03-3.93)</b> | <b>0.04</b>  | <b>2.12</b>  | <b>(1.23-3.66)</b> | <b>0.006</b> |

**Supplementary Table 9| Logistic regression testing prediction capacity of digital variable to predict clinical variables .**

**T stage estimation using logistic regression**

| Variable     | Odds ratio | 95% CI           | P value  |
|--------------|------------|------------------|----------|
| Stromal area | 1.2543     | 1.1238 to 1.9875 | 4.44e-05 |
| CD3 TC       | 0.9995     | 0,9990 to 0.9998 | 0.043    |
| DGMate       | 4.3153     | 2.2649 to 7.9872 | 6.96e-05 |

**N stage estimation using logistic regression**

| Variable     | Odds ratio | 95% CI           | P value  |
|--------------|------------|------------------|----------|
| Stromal area | 0,9942     | 0,9868 to 1,0017 | 0.129    |
| CD3 TC       | 1,0001     | 0,9997 to 1,0004 | 0.722    |
| DGMate       | 0,3647     | 0,2320 to 0,5732 | 1.23e-05 |

**Differentiation stage estimation using logistic regression**

| Variable     | Odds ratio | 95% CI           | P value |
|--------------|------------|------------------|---------|
| Stromal area | 0,9950     | 0,9861 to 1,0040 | 0.2740  |
| CD3 TC       | 1,0003     | 0,9998 to 1,0007 | 0.2267  |
| DGMate       | 0,6104     | 0,3547 to 1,0504 | 0.0746  |

**BRAF/RAS status estimation using logistic regression**

| Variable     | Odds ratio | 95% CI           | P value |
|--------------|------------|------------------|---------|
| Stromal area | 0,9991     | 0,9916 to 1,0066 | 0.80922 |
| CD3 TC       | 1,0000     | 0,9997 to 1,0003 | 0.91369 |
| DGMate       | 0,5238     | 0,3418 to 0,8026 | 0.00298 |

:
